# Supplementary material
Source: Springer Nature journal article supplement (https://www.springermedizin.de/resource/supplementary/12995_2013_290_MOESM5_ESM.pdf/9622988)

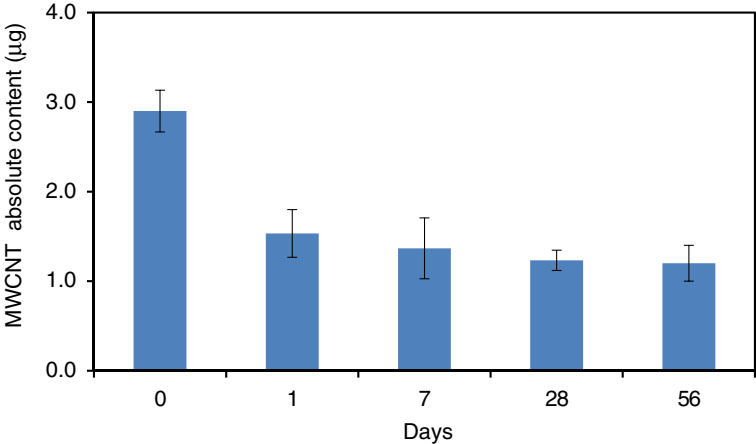

Supplement: MOESM5 [file 9622988]
